# Supplementary material for: A dual-targeting, apoptosis-inducing organometallic half-sandwich iridium anticancer complex
Source: Royal Society of Chemistry journal article supplement (doi:10.1039/c4mt00112e), 2014-01-01
Supplement: c4mt00112e1.pdf [file c4mt00112e1.pdf]

## Supplementary Information

### A dual-targeting, apoptosis-inducing organometallic half-sandwich iridium anticancer complex

Vojtech Novohradsky,<sup>a,b</sup> Lenka Zerzankova,<sup>a</sup> Jana Stepankova,<sup>a</sup> Anna Kiso<sup>a</sup>, Hana Kostrhunova<sup>a</sup>, Zhe Liu,<sup>c,d</sup> Peter J. Sadler,<sup>c</sup> Jana Kasparkova<sup>b</sup>, Viktor Brabec<sup>\*,a</sup>

<sup>a</sup> *Institute of Biophysics, Academy of Sciences of the Czech Republic, v.v.i., Kralovopolska 135, CZ-61265 Brno, Czech Republic. Fax: +420 541240499; Tel: +420 541517178; E-mail: jana@ibp.cz*

<sup>b</sup> *Department of Biophysics, Faculty of Science, Palacky University, 17. listopadu 12, CZ-77146 Olomouc, Czech Republic*

<sup>c</sup> *Department of Chemistry, University of Warwick, Gibbet Hill Road, Coventry CV4 7AL, United Kingdom*

<sup>d</sup> *Current address: Department of Chemistry, University of Basel, Spitalstrasse 51, 4056 Basel, Switzerland*

To whom correspondence should be addressed: brabec@ibp.cz

#### Cytotoxicity testing:

**MTT assay:** Cell death was evaluated using a system based on the tetrazolium compound MTT. Briefly, after the treatment period, 10  $\mu$ L of a freshly diluted MTT solution (2.5 mg mL<sup>-1</sup>) was added to each well, and the plate was incubated at 37 °C in a humidified 5 % CO<sub>2</sub> atmosphere for 4 h. At the end of the incubation period, the medium was removed, and the formazan product was dissolved in 100  $\mu$ L of dimethyl sulfoxide. Cell viability was evaluated by measurement of the absorbance at 570 nm, using a SUNRICE Tecan absorbance reader (Schoeller). Compound concentrations that produce 50 % cell growth inhibition (IC<sub>50</sub>) were calculated from curves constructed by plotting cell survival (%) versus drug concentration ( $\mu$ M). The reading values were converted to the percentage of the control (percentage cell survival). Cytotoxic effects were expressed as IC<sub>50</sub>. Concentrations of treated complexes in medium during treatment were verified by FAAS.

**Sulphorhodamine B (SRB) assay.** After the treatment period, the adherent cells were washed twice with PBS and fixed with 10% trichloroacetic acid (TCA). Suspension human leukemia HL-60 cells were fixed with 50% TCA added directly to the whole treated volume without any previous PBS washing. After 1 h, the fixed cells were washed with MiliQ water and incubated with 0.4% SRB for 30 min. Wells were washed three times with 1% acetic acid and SRB stained cellular proteins were dissolved with Tris base (pH 10.5). The absorbance at 570 nm was measured using a SUNRICE Tecan absorbance reader (Schoeller). IC<sub>50</sub> values were calculated from curves constructed by plotting cell survival (%) versus drug concentration ( $\mu$ M). The reading values were converted to the percentage of control (% cell survival). Cytotoxic effects were expressed as IC<sub>50</sub>. Concentrations of treated complexes in medium during treatment were verified by FAAS.

**Neutral red (NR) assay:** After the treatment period, 20  $\mu\text{L}$  of a 0.33% solution of neutral red in phosphate buffered saline (PBS) was added to each well with adherent cells and the plate was incubated at 37 °C in a humidified 5 %  $\text{CO}_2$  atmosphere for 2 h. Suspension human leukemia HL-60 cells were fixed prior the staining with 50% TCA. Afterwards, the dye containing medium was carefully removed and the cells were quickly rinsed with neutral red assay fixative (0.1%  $\text{CaCl}_2$  in 0.5% formaldehyde). The incorporated dye was then solubilized in 200  $\mu\text{L}$  of 1% acetic acid in 50% ethanol, allowed to stand for 10 min at room temperature and the absorbance was measured at  $\lambda=540$  nm with a SUNRICE Tecan absorbance reader (Schoeller). The background absorbance of the plates at 690 nm was also measured and subtracted from 540 nm measurement.  $\text{IC}_{50}$  values were calculated from curves constructed by plotting cell survival (%) versus drug concentration ( $\mu\text{M}$ ). The reading values were converted to the percentage of the control (percentage cell survival). Cytotoxic effects were expressed as  $\text{IC}_{50}$ . Concentrations of treated complexes in medium during treatment were verified by FAAS.

Table S1A:  $\text{IC}_{50}$  Values ( $\mu\text{M}$ ) obtained by MTT assay for complex **1** and cisplatin after 72 h of treatment. Data are expressed as mean  $\pm$  SD values of three independent experiments, each made in triplicate

|           | A2780           | A2780cisR       | RF <sup>a</sup> | HL-60           | MCF-7           | CHO-K1         | TI <sup>b</sup> |
|-----------|-----------------|-----------------|-----------------|-----------------|-----------------|----------------|-----------------|
| <b>1</b>  | 0.78 $\pm$ 0.01 | 0.97 $\pm$ 0.03 | 1.3             | 0.41 $\pm$ 0.07 | 2.01 $\pm$ 0.11 | 32.5 $\pm$ 4.9 | 41.7            |
| cisplatin | 2.64 $\pm$ 0.47 | 15.0 $\pm$ 1.1  | 4.8             | 0.47 $\pm$ 0.07 | 22.9 $\pm$ 2.9  | 14.6 $\pm$ 1.6 | 5.5             |

<sup>a</sup>Resistance factor, defined as  $\text{IC}_{50}$  (resistant, A2780cisR)/ $\text{IC}_{50}$  (sensitive, A2780).

<sup>b</sup>Therapeutic Index calculated as a ratio of the  $\text{IC}_{50}$  of normal, noncancerous cells (CHO-K1 or HSF), to the  $\text{IC}_{50}$  obtained for cancer cells (A2780).

Table S1B:  $\text{IC}_{50}$  Values ( $\mu\text{M}$ ) obtained by Neutral red assay for complex **1** and cisplatin after 72 h of the treatment. Data are expressed as mean  $\pm$  SD values of three independent experiment, each made in triplicate

|           | A2780           | A2780cisR       | RF <sup>a</sup> | HL-60           | MCF-7           | CHO-K1         | TI <sup>b</sup> |
|-----------|-----------------|-----------------|-----------------|-----------------|-----------------|----------------|-----------------|
| <b>1</b>  | 0.45 $\pm$ 0.07 | 0.46 $\pm$ 0.06 | 1.0             | 0.26 $\pm$ 0.08 | 1.20 $\pm$ 0.04 | 53.0 $\pm$ 6.5 | 117.8           |
| cisplatin | 0.66 $\pm$ 0.15 | 2.65 $\pm$ 0.21 | 4.0             | 0.61 $\pm$ 0.08 | 7.9 $\pm$ 1.2   | 34.6 $\pm$ 4.8 | 52.4            |

<sup>a</sup>Resistance factor, defined as  $\text{IC}_{50}$  (resistant, A2780cisR)/ $\text{IC}_{50}$  (sensitive, A2780).

<sup>b</sup>Therapeutic Index calculated as a ratio of the  $\text{IC}_{50}$  of normal, noncancerous cells (CHO-K1 or HSF), to the  $\text{IC}_{50}$  obtained for cancer cells (A2780).

Table S2: IC<sub>50</sub> Values (μM) in A2780 cells obtained by MTT assay for complex **1** and cisplatin as dependent on treatment interval. The data are expressed as mean ± SD values of three independent experiments, each made in triplicate

|           | 24 h        | 48 h        | 72 h        |
|-----------|-------------|-------------|-------------|
| <b>1</b>  | 1.84 ± 0.45 | 0.83 ± 0.06 | 0.78 ± 0.01 |
| cisplatin | 20.8 ± 6.4  | 2.79 ± 0.65 | 2.64 ± 0.47 |

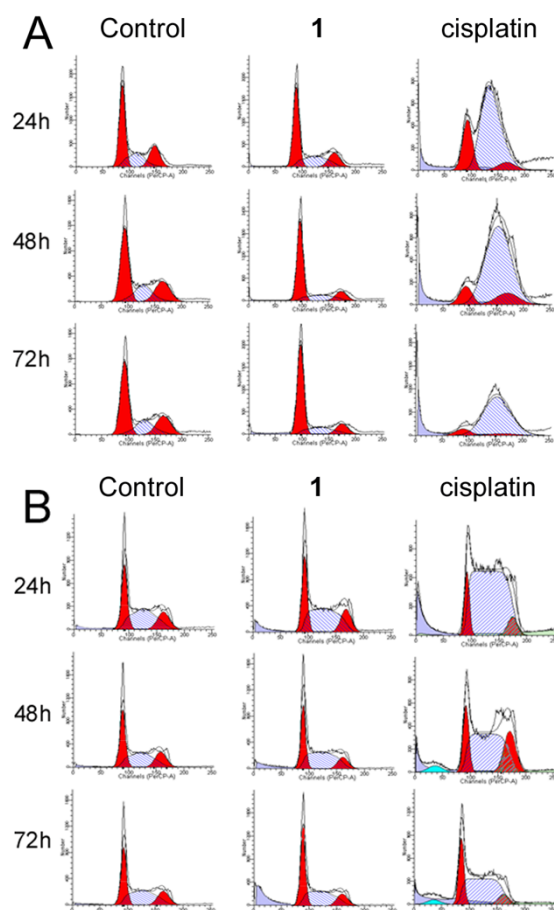

**Fig. S1.** Flow cytometric detection of the cell-cycle profiles in A2780 and HL60 cells. Effects of equitoxic doses (IC<sub>50</sub>) of **1** and cisplatin on cell cycle distribution of A2780 (A) or HL-60 (B) cells. Left panels, untreated (control) A2780 or HL-60 cells; middle panels, A2780 or HL 60 cells treated with 0.8 μM or 0.5 μM **1**, respectively, for 24, 48 or 72 h; right panels, A2780 or HL-60 cells treated with 3.1 μM or 0.5 μM cisplatin for 24, 48 or 72 h.

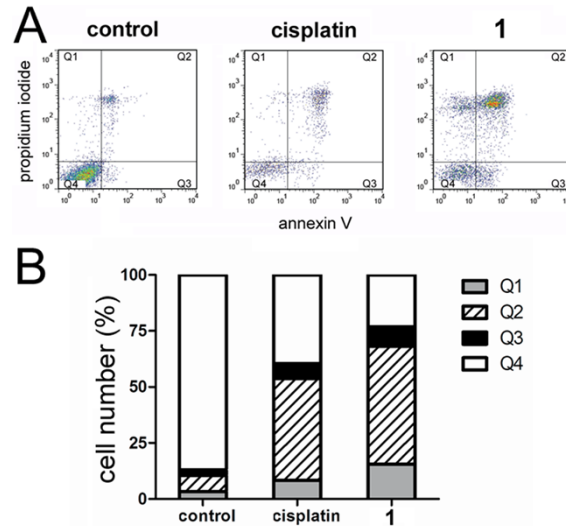

**Fig. S2.** Quantification of apoptosis after 48-h exposure of A2780 cells to 1 or cisplatin. **A.** Induction of apoptosis in A2780 cells after treatment with 1 or cisplatin. Cells were untreated (control) or treated with 20  $\mu\text{M}$  ( $\text{IC}_{90,48\text{h}}$ ) cisplatin or 2.6  $\mu\text{M}$  ( $\text{IC}_{90,48\text{h}}$ ) 1 for 48 h. **B.** Quantitative evaluation. Quadrant 1, PI-positive (cells undergoing necrosis); Quadrant 2, Annexin V-positive /PI-positive (cells in the late period of apoptosis and undergoing necrosis); Quadrant 3, Annexin V positive/ PI-negative (cells in the early period of apoptosis); Quadrant 4, Annexin V –negative/ PI-negative (living cells). The experiment was made in triplicate.

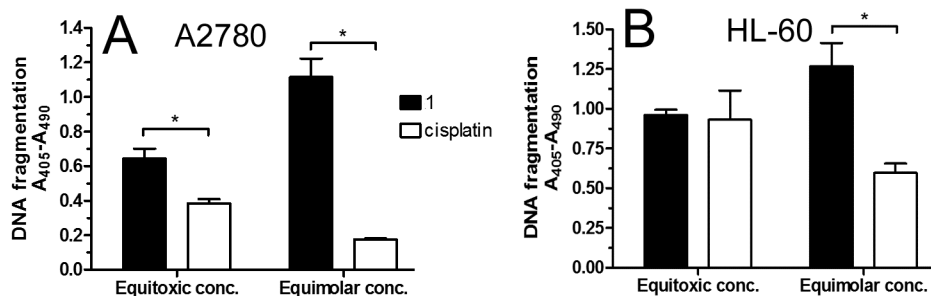

**Fig S3.** DNA apoptotic fragmentation induced by 1 and cisplatin quantified by a specific ELISA colorimetric kit. Comparison of the efficiency of 1 and cisplatin in inducing apoptosis in A2780 (A) or HL60 (B). Cells were treated with equimolar (3  $\mu\text{M}$ ) or equitoxic ( $\text{IC}_{50,24\text{h}}$ ) concentrations for 24 h. The symbol (\*) denotes significant difference ( $p < 0.01$ ). Experiments were made in triplicate.

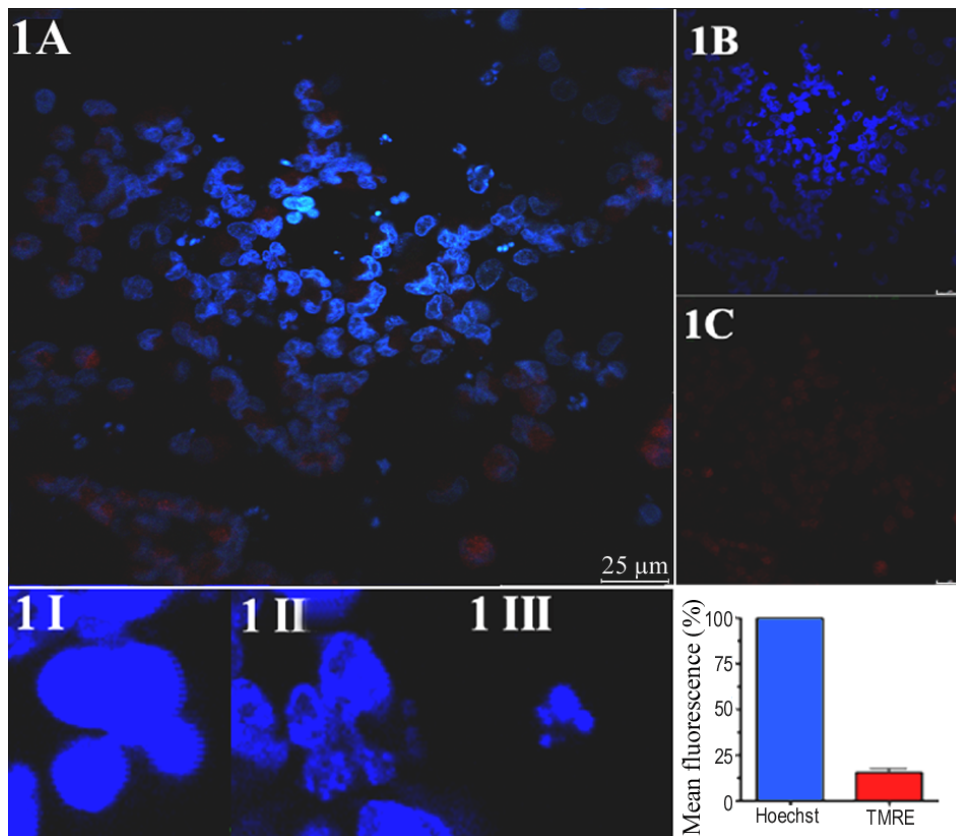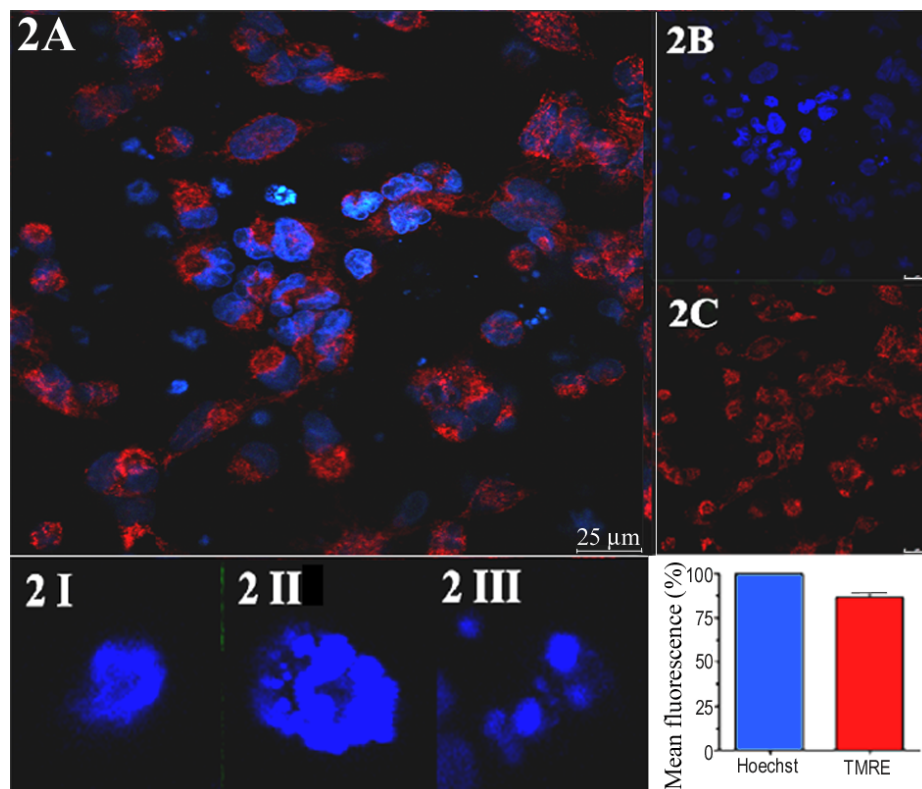

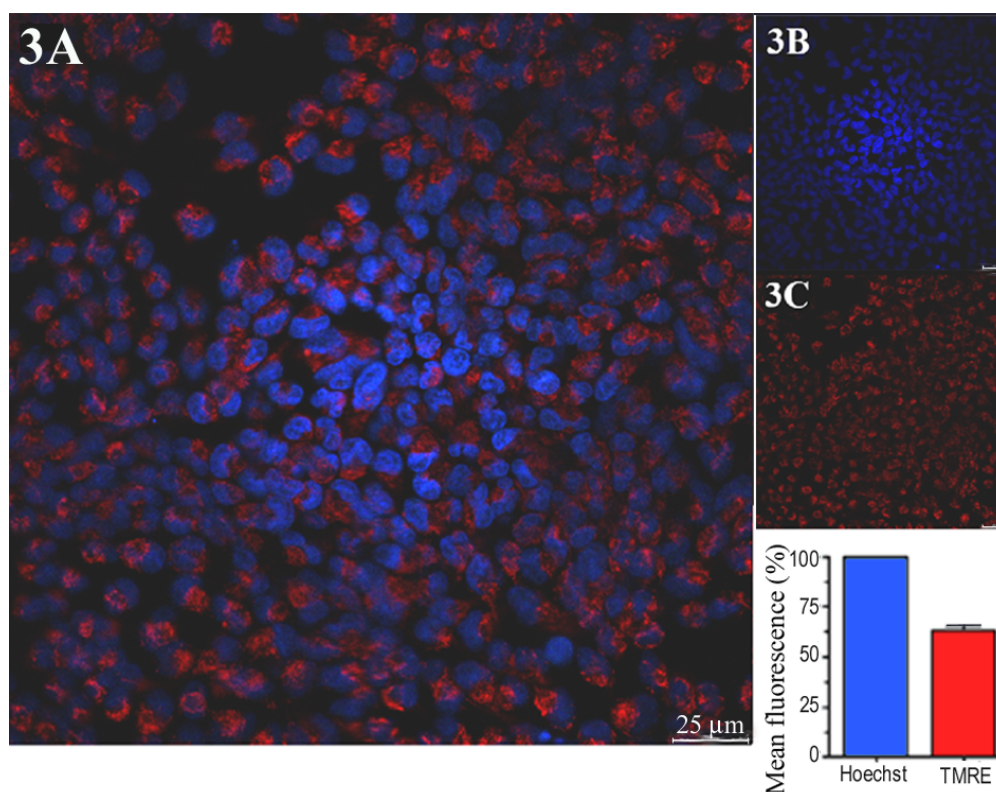

**Fig. S4.** Multi-parameter apoptosis assay. Confocal microphotographs obtained after the treatment of A2780 cells with complex **1** (1), cisplatin (2) at the concentration corresponding to  $IC_{90,48hr}$  or for untreated cells (3). A – a merge output of both fluorescence channels, B - cell nuclei stained with Hoechst dye, C - fluorescence signal of TMRE for detection of mitochondrial membrane potential. Typical features of apoptosis are shown at panels 1 and 2: I - pyknosis (nucleus condensation), II - karyorrhexis (nucleus fragmentation) and III - presence of apoptotic bodies. Fluorescence analysis is on the right bottom part of the picture, signals from the individual channels were normalized to fluorescence of Hoechst dye.
